# Supplementary material for: Riboswitches for the alarmone ppGpp expand the collection of RNA-based signaling systems
Source: PubMed Central journal article supplement — Proc Natl Acad Sci U S A. 2018 May 21;115(23):6052–7. doi: 10.1073/pnas.1720406115 (PMC6003355; doi:10.1073/pnas.1720406115), 2018-05-21
Supplement: pnas.1720406115.sapp.pdf [file pnas.1720406115.sapp.pdf]

## SI Appendix

### **Riboswitches for the alarmone ppGpp expand the collection of RNA-based signaling systems**

**Madeline E. Sherlock,<sup>1</sup> Narasimhan Sudarsan,<sup>2</sup> Ronald R. Breaker<sup>1,2,3\*</sup>**

<sup>1</sup>Department of Molecular Biophysics and Biochemistry, <sup>2</sup>Howard Hughes Medical Institute, <sup>3</sup>Department of Molecular, Cellular and Developmental Biology, Yale University, P.O. Box 208103, New Haven, CT 06520-8103, USA.

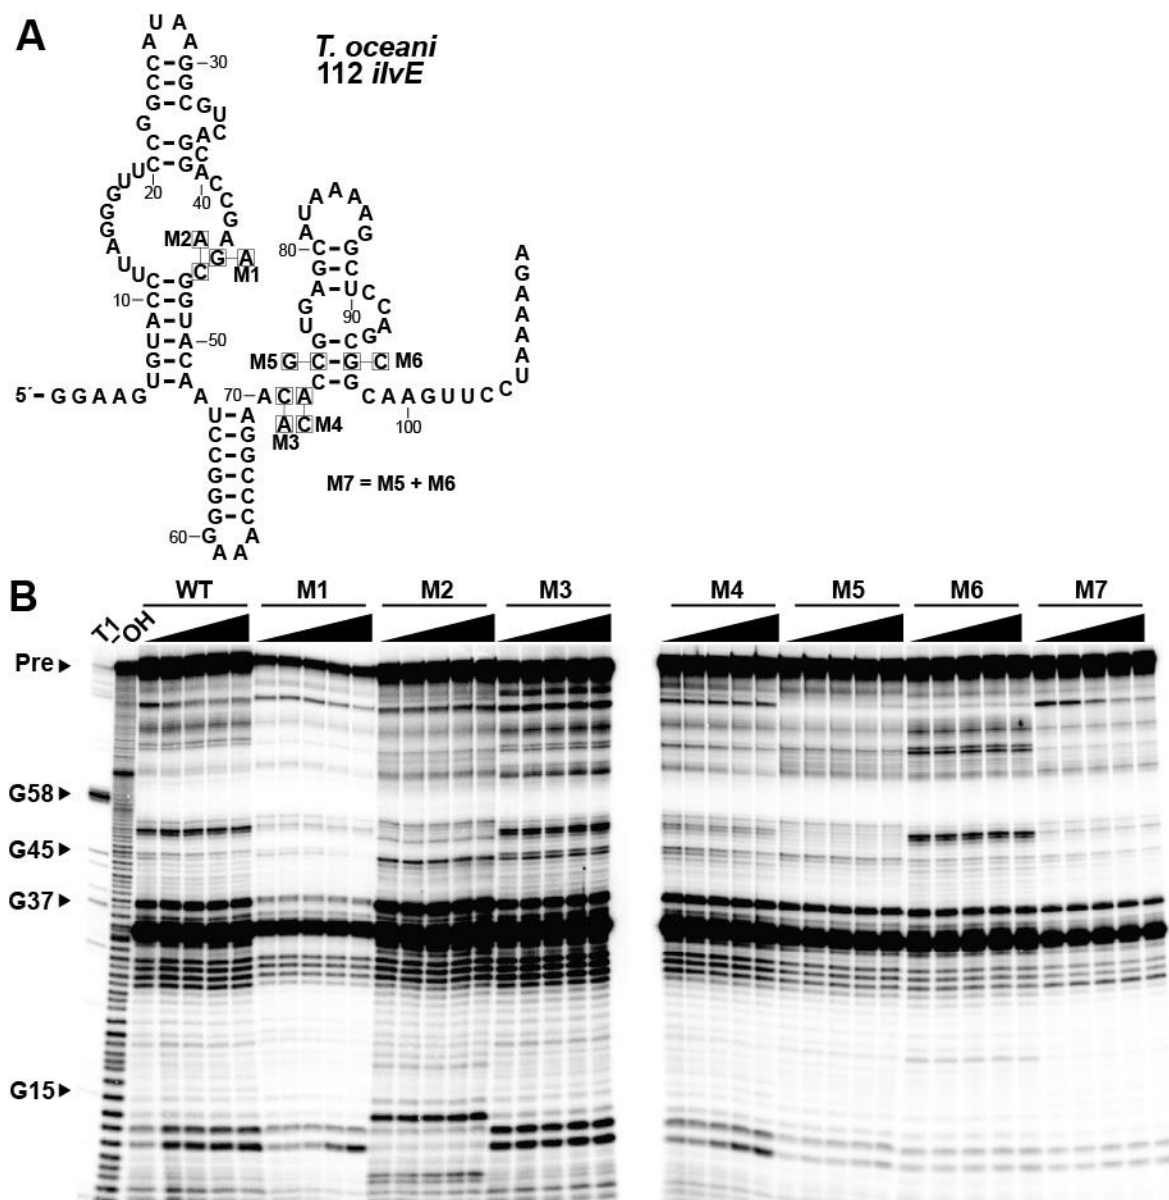

**Fig. S1.** Mutation of conserved nucleotides disrupt ppGpp binding. (A) Sequence and secondary structure of the 112 *ilvE* RNA from *T. oceanii*. Single nucleotide positions that were altered to produce each mutant RNA are identified with boxes, annotated with the nucleotide identity of each mutation, and labeled M1 through M6. M7 contains mutations at both positions specified by M5 and M6. (B) PAGE analysis of in-line probing assays with WT and mutated sequences of the 112 *ilvE* RNA in the presence of 0, 100 nM, 1  $\mu$ M, 10  $\mu$ M, or 100  $\mu$ M ppGpp. Additional annotations are as described in the legend to **Fig. 2B**. Note that, for the mutant constructs, either no modulation (M2, M3, M5, M6) or very little modulation (M1, M4) is observed only at the highest ppGpp concentrations tested (10  $\mu$ M and 100  $\mu$ M). Because the  $K_D$  measured for the WT

construct is 10 nM, this means that most mutant constructs experience at least three orders of magnitude loss of affinity.

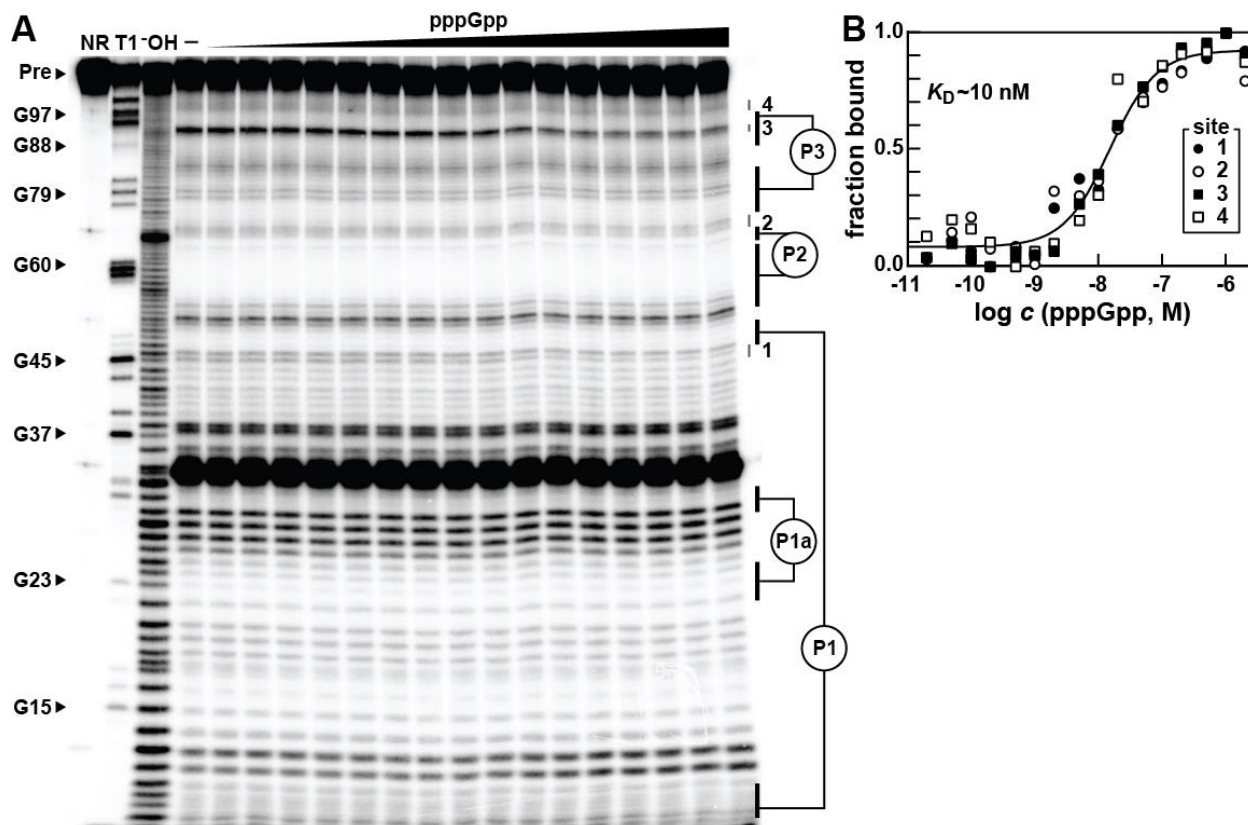

**Fig. S2.** Recognition of pppGpp by a riboswitch aptamer. (A) PAGE analysis of the products of in-line probing of 5'-<sup>32</sup>P-labeled 112 *ilvE* RNA in the presence of increasing pppGpp concentrations. In-line probing experiments contained either no ligand (-) or pppGpp ranging from 20 pM to 2 μM. Annotations are as described for **Fig. 2B**. (B) Plot of the fraction of RNA bound by pppGpp, as determined by the normalized fraction of RNA scission at regions 1 through 4 as a function of the logarithm of pppGpp concentration. Additional details are as describe in the legend to **Fig. 2C**.

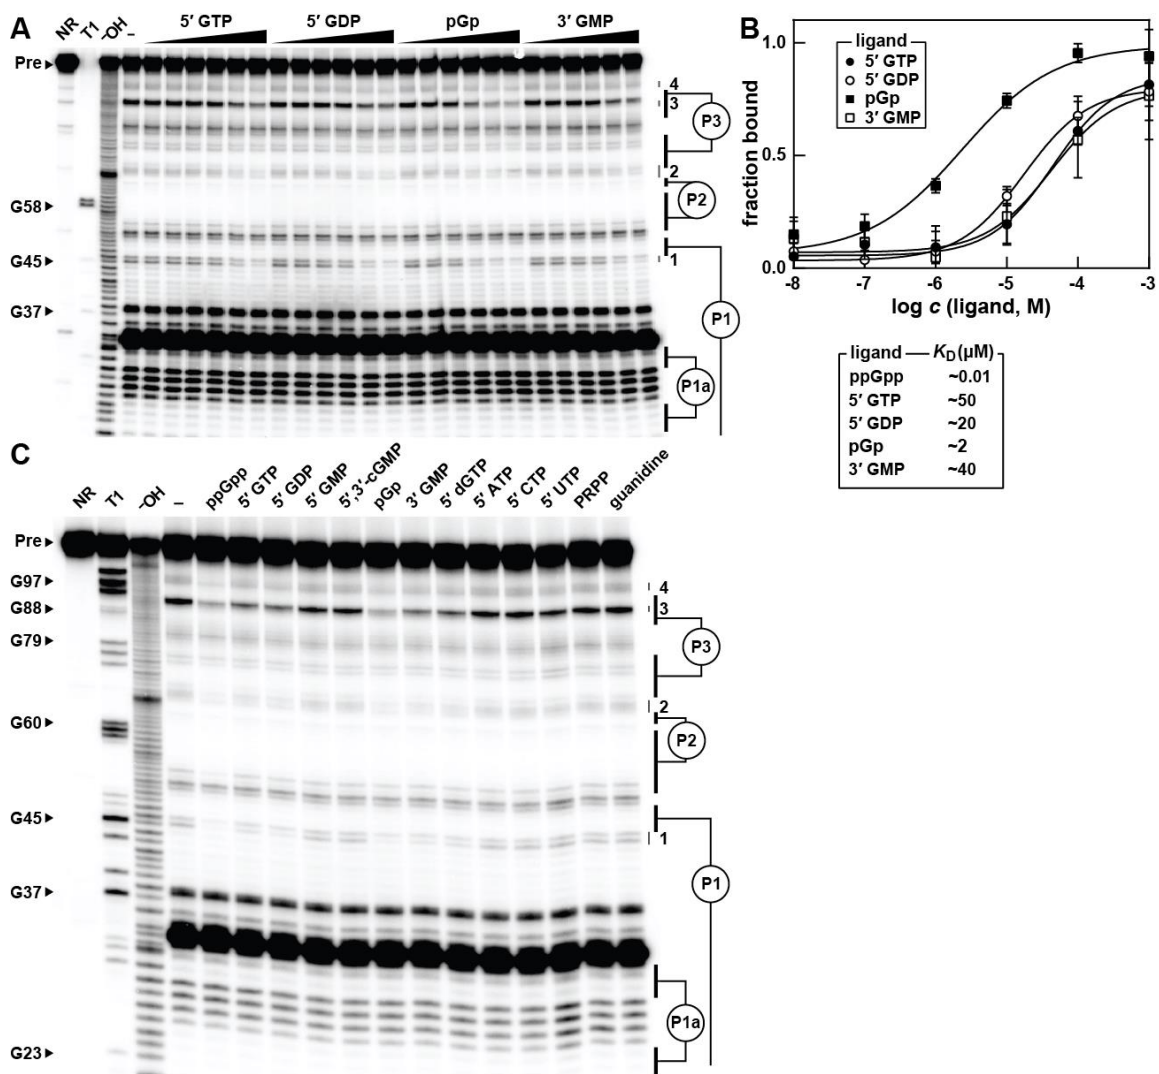

**Fig. S3.** Binding selectivity of a representative ppGpp riboswitch. (A) PAGE analysis of in-line probing reactions of the 112 *ilvE* aptamer from *T. oceanii* (see **Fig. 2A**) in the presence of structural analogs of ppGpp that exhibited structural modulation. Each compound was tested at 10 nM, 100 nM, 1  $\mu$ M, 10  $\mu$ M, 100  $\mu$ M, and 1 mM. Annotations are as described for **Fig. 2B**. (B) Plot of the fraction of RNA bound by each ligand, as determined by the average and standard deviation of the normalized fraction of RNA scission at regions 1-4 as a function of the logarithm of ligand concentration. Additional details are as describe in the legend to **Fig. 2C**. (C) PAGE analysis of in-line probing reactions of the 112 *ilvE* aptamer in the presence of 100  $\mu$ M concentration of various analogs of ppGpp, nucleotides, or the known ligands of other *ykkC* motif RNA subtypes (PRPP and guanidine).

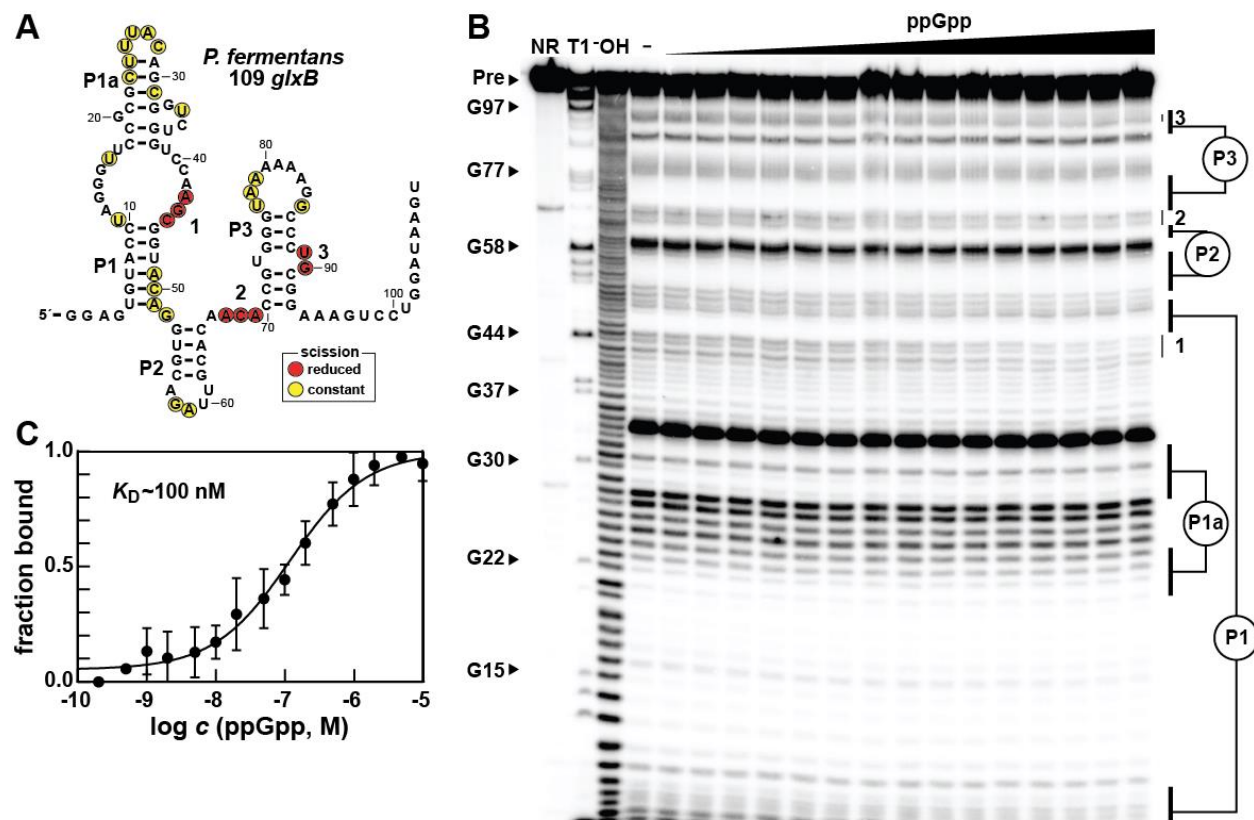

**Fig. S4.** Ligand binding by an additional ppGpp riboswitch aptamer representative found upstream of glutamate synthase genes. (A) Sequence and secondary structure of the 109 nucleotide RNA derived from the *glxB* gene of *Pelosinus fermentans*. Data collected in B were used to determine regions of constant or reduced scission upon the addition of ppGpp to in-line probing assays. (B) PAGE analysis of the products of in-line probing of 5'-<sup>32</sup>P-labeled 109 *glxB* RNA in the presence of increasing ppGpp concentrations. Annotations are as described for Figure 2B. In-line probing experiments contained either no ligand (-) or ppGpp ranging from 200 pM to 10 μM. Regions 1-3 of the RNA exhibit structural stabilization in a ppGpp-dependent manner. Note that this banding pattern and the pattern of changes resulting from in-line probing assay reactions are not identical to those observed for the original *T. oceanii ilvE* construct presented in **Fig. 2**. The distinct nucleotide sequences of these representatives will exhibit patterns specific to these individual constructs. (C) Plot of the fraction of 109 *glxB* RNA bound to ligand as a function of the logarithm of ppGpp concentration. The fraction bound value plotted at each ppGpp concentration is the average of the values derived from band intensities at regions 1, 2 and 3 after normalization to a value between 1 (band intensity in the absence of ppGpp) and 0 (band intensity at maximum ppGpp concentration). The fraction bound value equals 1 minus



the logarithm of ppGpp concentration. The fraction bound value plotted at each ppGpp concentration was derived as described in the legend to **SI Appendix, Fig. S4**. Additional details are as describe in the legend to **Fig. 2C**.

**Supplementary Table 1 | Sequences of synthetic DNAs used in this study.**

| Name   | Sequence                                                                                      | Annotation                                                                         |
|--------|-----------------------------------------------------------------------------------------------|------------------------------------------------------------------------------------|
| MES137 | TAATACGACTCACTATAGG<br>AAGTGTACCTTAGGGTTCC<br>GGCCATAAGGCGTCAGCG<br>ACCGAGCGGTACAATCCG<br>GGG | Forward template for transcription of the WT <i>T. oceanus</i> 112 <i>ilvE</i> RNA |
| MES138 | TCTTTTAGGAACTTGCCGC<br>TGGAGCCTTTTATGCTCAC<br>GGTGTTCGGGTTTCCCCG<br>GATTGTACCGCTCGG           | Reverse template for transcription of the WT <i>T. oceanus</i> 112 <i>ilvE</i> RNA |
| MES177 | TAATACGACTCACTATAGG<br>AAGTGTACCTTAGGGTTCC<br>GGCCATAAGGCGTCAGCG<br>ACCGAACGGTACAATCCG<br>GGG | Forward template for transcription of the M1 <i>T. oceanus</i> 112 <i>ilvE</i> RNA |
| MES178 | TCTTTTAGGAACTTGCCGC<br>TGGAGCCTTTTATGCTCAC<br>GGTGTTCGGGTTTCCCCG<br>GATTGTACCGTTCGG           | Reverse template for transcription of the M1 <i>T. oceanus</i> 112 <i>ilvE</i> RNA |
| MES179 | TAATACGACTCACTATAGG<br>AAGTGTACCTTAGGGTTCC<br>GGCCATAAGGCGTCAGCG<br>ACCGAGAGGTACAATCCG<br>GGG | Forward template for transcription of the M2 <i>T. oceanus</i> 112 <i>ilvE</i> RNA |
| MES180 | TCTTTTAGGAACTTGCCGC<br>TGGAGCCTTTTATGCTCAC<br>GGTGTTCGGGTTTCCCCG<br>GATTGTACCTCTCGG           | Reverse template for transcription of the M2 <i>T. oceanus</i> 112 <i>ilvE</i> RNA |
| MES181 | TCTTTTAGGAACTTGCCGC<br>TGGAGCCTTTTATGCTCAC<br>GGTTTTCCGGGTTTCCCCG<br>GATTGTACCGCTCGG          | Reverse template for transcription of the M3 <i>T. oceanus</i> 112 <i>ilvE</i> RNA |
| MES182 | TCTTTTAGGAACTTGCCGC<br>TGGAGCCTTTTATGCTCAC<br>GGGGTTCCGGGTTTCCCCG<br>GATTGTACCGCTCGG          | Reverse template for transcription of the M4 <i>T. oceanus</i> 112 <i>ilvE</i> RNA |
| MES183 | TCTTTTAGGAACTTGCCGC<br>TGGAGCCTTTTATGCTCAC<br>CGTGTTCGGGTTTCCCCG<br>GATTGTACCGCTCGG           | Reverse template for transcription of the M5 <i>T. oceanus</i> 112 <i>ilvE</i> RNA |
| MES184 | TCTTTTAGGAACTTGCGGC<br>TGGAGCCTTTTATGCTCAC<br>GGTGTTCGGGTTTCCCCG<br>GATTGTACCGCTCGG           | Reverse template for transcription of the M6 <i>T. oceanus</i> 112 <i>ilvE</i> RNA |



|        |                                                                                                                                                                                                                                                                                                                            |                                                                                                                                                                                                                                                |
|--------|----------------------------------------------------------------------------------------------------------------------------------------------------------------------------------------------------------------------------------------------------------------------------------------------------------------------------|------------------------------------------------------------------------------------------------------------------------------------------------------------------------------------------------------------------------------------------------|
| MES144 | TCTTTTAGGAACTTGCGGC<br>TGGAGCCTTTTATGCTCAC<br>CGTGTTCGGGTTTCCCCG<br>GATTGTACCGCTCGG                                                                                                                                                                                                                                        | Reverse template for transcription of the M7 <i>T. oceanus</i> 112 <i>ilvE</i> RNA                                                                                                                                                             |
| MES207 | TCTTTTAGGAACTTGCCGC<br>TGGAGCCTTTTATGCTCAC<br>GGTATTCCGGGTTTCCCCG<br>GATTGTACCGCTCGG                                                                                                                                                                                                                                       | Reverse template for transcription of the M8 <i>T. oceanus</i> 112 <i>ilvE</i> RNA                                                                                                                                                             |
| MES208 | TAATACGACTCACTATAGG<br>AGTGTACCTAGGGTTCCGC<br>GCTTTACAGCGGTCTGGTC<br>CAAGCGGTACAGGTGC                                                                                                                                                                                                                                      | Forward template for transcription of the WT <i>P. fermentans</i> 109 <i>glxB</i> RNA                                                                                                                                                          |
| MES209 | ACTTATCCAGGACTTTCCG<br>CAGGGCCTTTTTTACCCAC<br>GGTGTGCAATCTGCAC<br>CTGTACCGCTTGGACC                                                                                                                                                                                                                                         | Reverse template for transcription of the WT <i>P. fermentans</i> 109 <i>glxB</i> RNA                                                                                                                                                          |
| MES212 | TAATACGACTCACTATAGG<br>AGAGTGCATCTAGGGTTCC<br>GATGGAAACATGTCTGGTC<br>CGAGCGATGCAGG                                                                                                                                                                                                                                         | Forward template for transcription of the WT <i>Clostridium sp. BL8</i> 104 <i>natA</i> RNA                                                                                                                                                    |
| MES213 | CATAGGTTGAGACTCGTCC<br>TTTAGGCTTTTTTCTAAA<br>AGTGTAGATAAAATCCTGC<br>ATCGCTCGGACCAGAC                                                                                                                                                                                                                                       | Reverse template for transcription of the WT <i>Clostridium sp. BL8</i> 104 <i>natA</i> RNA                                                                                                                                                    |
| MES153 | GCGCACATGAGAATTCCAG<br>CGACGCTGTTGATCCTTTT<br>AAATAAGTCTGATAAAATG<br>TGAAGTAAAGTTATAAATG<br>AAAGAATGTATTATAACAG<br>CAGGAAGTGTACCTAGGGT<br>TCCGGGAGCTGCTCCGTCT<br>GGTCCGAGCGGTACAAAA<br>TCCAGAGCATGGATTTACA<br>CCGTGGGCAGAAAATACC<br>CGAGCGGAAAGTTCCTCGA<br>GAGGGTAGGAACACCGCT<br>CGGTTTTCTATAATATTCA<br>GAGGATCCCCAGCTGCGC | IDT G-block containing the WT <i>D. hafniense ilvE</i> riboswitch and controlled by the <i>B. subtilis lysC</i> promoter, for serving as a dsDNA template for <i>in vitro</i> transcription termination assays                                 |
| MES154 | GCGCACATGAGAATTCCAG<br>CGACGCTGTTGATCCTTTT<br>AAATAAGTCTGATAAAATG<br>TGAAGTAAAGTTATAAATG<br>AAAGAATGTATTATAACAG<br>CAGGAAGTGTACCTAGGGT<br>TCCGGGAGCTGCTCCGTCT<br>GGTCCGAGAGGTACAAAA                                                                                                                                        | IDT G-block containing the mutation of a conserved nucleotide (M9) <i>D. hafniense</i> riboswitch and controlled by the <i>B. subtilis lysC</i> promoter, for serving as a dsDNA template for <i>in vitro</i> transcription termination assays |

|        |                                                                                                                                     |                                                                                                                                   |
|--------|-------------------------------------------------------------------------------------------------------------------------------------|-----------------------------------------------------------------------------------------------------------------------------------|
|        | TCCAGAGCATGGATTTACA<br>CCGTGGGCAGAAAATACC<br>CGAGCGGAAAGTTCCTCGA<br>GAGGGTAGGAACACCGCT<br>CGGTTTTCTATAATATTCA<br>GAGGATCCCCAGCTGCGC |                                                                                                                                   |
| MES157 | GCGCACATGAGAATTCCAG<br>CGACG                                                                                                        | Forward primer for amplification of <i>D. hafniense ilvE</i> single-round transcription termination assay templates               |
| MES158 | GCGCAGCTGGGGATCCTCT<br>G                                                                                                            | Reverse primer for amplification of the <i>D. hafniense ilvE</i> WT and M9 single-round transcription termination assay templates |
| MES200 | CCGAGCGGTGTTTCCTACCC<br>TC                                                                                                          | Reverse primer for amplification of the M10 <i>D. hafniense ilvE</i> single-round transcription termination assay template        |
| MES204 | GCGCAGCTGGGGATCCTCT<br>GAATATTATAAAAAACCG<br>AGCGGTGTTTCCTACCC                                                                      | Reverse primer for amplification of the M11 <i>D. hafniense ilvE</i> single-round transcription termination assay template        |
